1 **The plant circadian clock influences rhizosphere community structure and function**

2

3 Charley J. Hubbard<sup>1, 2</sup>, Marcus T. Brock<sup>1</sup>, Linda T.A. van Diepen<sup>2, 3</sup>, Loïs Maignien<sup>4, 5</sup>, Brent E.

4 Ewers<sup>1, 2</sup>, Cynthia Weinig<sup>1, 2, 6</sup>

5

6 1. Department of Botany, University of Wyoming, Laramie, WY, USA

7 2. Program in Ecology, University of Wyoming, Laramie, WY, USA

8 3. Ecosystem Science and Management, University of Wyoming, Laramie, WY, USA

9 4. Marine Biological Laboratory, Josephine Bay Paul Center, Woods Hole, MA, USA

10 5. Laboratory of Microbiology of Extreme Environments, UMR 6197, Institut Européen de la

11 Mer, Université de Bretagne Occidentale, Plouzane, France

12 6. Department of Molecular Biology, University of Wyoming, Laramie, WY, USA

13

14 **Corresponding Author:** Cynthia Weinig, 1000 E. University Ave. Aven Nelson Room 126,

15 Laramie, WY 82071, [cweinig@uwyo.edu](mailto:cweinig@uwyo.edu)

16 **Running title:** Host clock affects the rhizosphere microbiome

17 **Conflict of Interest Statement:** The authors report no conflicts of interest.

18 **Subject Category:** Microbe-microbe and microbe-host interactions

19

20 **Abstract**

21 Plants alter chemical and physical properties of soil, and thereby influence rhizosphere microbial  
22 community structure. The structure of microbial communities may in turn affect plant  
23 performance. Yet, outside of simple systems with pairwise interacting partners, the plant genetic  
24 pathways that influence microbial community structure remain largely unknown, as are the  
25 performance feedbacks of microbial communities selected by the host plant genotype. We  
26 investigated the role of the plant circadian clock in shaping rhizosphere community structure and  
27 function. We performed 16S rRNA gene sequencing to characterize rhizosphere bacterial  
28 communities of *Arabidopsis thaliana* between day and night time points, and tested for  
29 differences in community structure between wild-type (Ws) vs. clock mutant (*toc1-21*, *ztl-30*)  
30 genotypes. We then characterized microbial community function, by growing wild-type plants in  
31 soils with an overstory history of Ws, *toc1-21* or *ztl-30* and measuring plant performance. We  
32 observed that rhizosphere community structure varied between day and night time points, and  
33 clock malfunction significantly altered rhizosphere communities. Finally, wild-type plants  
34 germinated earlier and were larger when inoculated with soils having an overstory history of  
35 wild-type in comparison to clock mutant genotypes. Our findings suggest the circadian clock of  
36 the plant host influences rhizosphere community structure and function.

37

38

## 39 Introduction

40 In comparison to unvegetated soils, the presence of plants dramatically affects the  
41 structure of soil microbial communities. Plant roots affect the physical as well as chemical  
42 environment through the exudation of carbon into the rhizosphere zone, which immediately  
43 surrounds the roots (Bais *et al.*, 2006; Jones *et al.*, 2009; Dennis *et al.*, 2010). Rhizosphere  
44 microbial community structure is dynamic and changes over the course of plant development  
45 (Lundberg *et al.*, 2012), in part due to changes in exudation (Chaparro *et al.*, 2014). Although  
46 much is known about rhizosphere assembly dynamics on longer time scales, there is currently  
47 little information regarding assembly dynamics on shorter, diurnal time scales. Further, while  
48 plant exudation may “feed-down” and affect microbial community structure, rhizosphere  
49 communities can “feed-up” and affect plant performance, by increasing plant access to nutrients  
50 (Çakmakçı *et al.*, 2001; Chen *et al.*, 2002; Richardson *et al.*, 2009; Richardson and Simpson,  
51 2011), relieving abiotic stress (Zolla *et al.*, 2013), suppressing pathogens (Mendes *et al.*, 2011,  
52 2013), altering phenology (Wagner *et al.*, 2014; Panke-Buisse *et al.*, 2014), and promoting plant  
53 growth (Bashan, 1998; Lugtenberg and Kamilova, 2009; Henning *et al.*, 2016). Some plant  
54 species, such as many legumes, have developmental genetic mechanisms that attract explicitly  
55 beneficial nitrogen-fixing rhizobia taxa (Bravo *et al.*, 2016). The extent to which plants may  
56 attract complex beneficial communities remains largely unclear.

57 The use of experimental genetic lines available in plant model species may reveal  
58 specific genetic paths that affect microbial community structure. Comparing mutant *vs.* wild-type  
59 plants of *Arabidopsis thaliana*, Lebeis *et al.* (2015) observed that salicylic acid, an immune  
60 signaling molecule, altered rhizosphere bacterial community structure. This finding suggests that  
61 genes regulating physiological traits, such as immune response, may play a role in shaping

62 rhizosphere communities. Genes regulating additional physiological traits such as gas-exchange  
63 and specifically carbon assimilation may also be worth examining, due to their effects on the  
64 photoassimilate pool available for allocation to root growth and for carbon exudation into the  
65 rhizosphere. More generally, the comparison of phenotypes between single-locus mutant  
66 genotypes with those expressed by wild-type genotypes removes potentially confounding effects  
67 of variation segregating elsewhere in the genome, and enables isolation of pathway-specific  
68 effects. Naturally occurring large-effect alleles at causal loci could in some cases play a role in  
69 shaping microbial community structure in natural plant populations or could be manipulated in  
70 crop species to improve plant growth.

71       Changes in the presence-absence (or abundance) of just a few microbial taxa can affect  
72 plant performance, due to the vast number of root-associated microbial cells and functions  
73 (Henning *et al.*, 2016). Across diverse ecosystems, community structure and function are related  
74 (Tilman *et al.*, 1997; Talbot *et al.*, 2014), including in plant-rhizosphere associations and in cases  
75 where microbial community membership changes by one to few taxa. For instance, Henning *et*  
76 *al.* (2016) observed that the addition of single bacterial taxa to the rhizosphere of *Populus*  
77 *trichocarpa* led to drastic changes in plant growth traits. Similarly, Zolla *et al.* (2013) observed  
78 differences in drought response by *Arabidopsis thaliana* plants grown in soil that differed in  
79 community structure as a consequence of overstory history. Thus, differences in rhizosphere  
80 community structure can lead to differences in rhizosphere community function as estimated  
81 from plant performance.

82       In the current study, we tested the role of the plant circadian clock in determining  
83 rhizosphere community structure and function, where function was measured as plant  
84 performance. The circadian clock regulates up to 30% of the transcriptome, and affects diverse

85 processes including patterned fluxes of carbon into (stomatal conductance, carbon assimilation)  
86 and out of (exudation) the plant on a diurnal scale (Watt and Evans, 1999; Harmer *et al.*, 2000;  
87 McClung, 2006; Covington *et al.*, 2008; Badri and Vivanco, 2009; Harmer, 2009; Greenham and  
88 McClung, 2015). We hypothesized that the circadian clock could shape rhizosphere community  
89 structure on a diurnal scale, if community structure responds to diurnally patterned fluxes of  
90 carbon into the rhizosphere, that is, we anticipated that microbial community structure might  
91 vary over the course of 24 hrs. We further hypothesized that rhizosphere communities of plant  
92 genotypes harboring clock mutations could differ from wild-type plants, due to differences in  
93 physiological phenotypes. Specifically, mutations in the clock genes *TIMING OF CAB*  
94 *EXPRESSION 1* and *ZEITLUPE* lead plants to express altered clock period, or the duration of  
95 one circadian cycle (Millar *et al.*, 1995; Kim *et al.*, 2005). As a consequence of altered clock  
96 function, clock mutants express distinct physiological phenotypes, including reduced carbon  
97 assimilation, chlorophyll content, and stomatal conductance (and thus root water uptake) relative  
98 to wild-type plants under 24 hr environmental cycles (Dodd *et al.*, 2004, 2005). Clock  
99 misfunction may influence rhizosphere communities, if for instance the reduced flux of carbon  
100 into plants influences the flux of carbon exudation (Thornton *et al.*, 2004) or if shifts in plant  
101 water use alter soil water potential and nutrient availability and hence the rhizosphere  
102 environment (Matimati *et al.*, 2014). Finally, if rhizosphere community structure is altered by  
103 mutations in clock genes, then we hypothesize there may be differences in community function  
104 in the form of plant performance, in which microbial communities shaped by wild-type  
105 genotypes may lead to improved plant performance in comparison to microbial communities  
106 found in association with clock mutant genotypes.

107

## 108 **Materials and Methods**

109

### 110 Plant Material and Growth Conditions

111 To investigate the role of the circadian clock in shaping rhizosphere community structure and  
112 function, we used the *Arabidopsis thaliana* accession, Wassilewskija (Ws, CS2360), and two  
113 circadian clock period mutants in the Ws background, *TIMING OF CAB EXPRESSION 1* (*toc1-*  
114 *21*) and *ZEITLUPE* (*ztl-30*). *toc1-21* is a short period mutant (~ 20 hours), while *ztl-30* is a long  
115 period mutant (~28 hours) in free-running conditions (Kevei *et al.*, 2006; Fujiwara *et al.*, 2008).  
116 Many prior studies have shown that the resonance between endogenous and environmental  
117 cycles affects plant phenotypes and performance (Dodd *et al.*, 2005; Yerushalmi and Green,  
118 2009; de Montaigu *et al.*, 2015; Salmela *et al.*, 2016); the current experiments extend prior  
119 research to test effects of the plant host clock on the rhizosphere microbiome.

120 For each experiment, seeds were surface sterilized using 15% bleach, 0.1% *Tween*, and  
121 84.9% RO H<sub>2</sub>O solution, cold stratified in the dark in 1ml of RO H<sub>2</sub>O for five days at 4°C, and  
122 placed in RO H<sub>2</sub>O to germinate in a Percival PGC-9/2 growth chamber (Percival Scientific,  
123 Perry, IN, USA) to ensure synchronous germination. Throughout this study, the growth chamber  
124 environment was set to 12/12 light-dark cycle (lights came on at 7 A.M. and turned off at 7  
125 P.M.), 22°C/18°C day-night temperature cycles, 40% relative humidity, and photosynthetic  
126 photon flux density = 350 μmol photons m<sup>-2</sup> s<sup>-1</sup>. Upon the observation of root radicles, seedlings  
127 were aseptically transferred to 2 inch in diameter pots filled with a mixture of sterilized potting  
128 media (N ~ 400 ppm, P ~ 90 ppm) and microbial inoculate. To generate our sterilized media,  
129 Redi-Earth Potting Mix (Sungro Horticulture, Agawam, MA, USA) was autoclaved twice for 60  
130 minutes. Next, 2ml of microbial inoculate was added to each pot. The microbial inoculate was

131 created by mixing 360ml of RO H<sub>2</sub>O with 40g of soil from the Catsburg region in Durham,  
132 North Carolina, USA (36.062294<sup>0</sup>N, -78.849644<sup>0</sup>W) and filtered through 1 000µm, 212µm,  
133 45µm sieves, to remove soil nematodes that might negatively impact plant performance (van de  
134 Voorde *et al.*, 2012). The Catsburg region has a well-documented history of *A. thaliana*  
135 occurrence, which has been naturalized in this region (Mauricio, 1998). Soil from the Catsburg  
136 region and our sterilized potting mix was characterized at the Colorado State Soil-Water-Plant  
137 Testing Lab (Fort Collins, CO, USA); of greatest relevance to microbial growth, the Catsburg  
138 and potting soils had similar pH values (5.4 vs. 5.3, respectively). Following germination,  
139 seedlings were thinned to one plant per pot, and pots were watered at 7 A.M. daily.

140

#### 141 Experimental Design

142 *Experiment 1: Temporal Changes in Rhizosphere Community Structure.* To determine if  
143 rhizosphere bacterial communities are diurnally dynamic, replicates of wild-type Ws plants were  
144 grown for four weeks as described above. Starting at 6 A.M. on July 21 and ending at 6 A.M. on  
145 July 22, 10 replicates were selected at random and harvested every 6 hrs for rhizosphere soil by  
146 separating the roots from the rosette (N = 50), removing closely adhering soil particles from the  
147 roots as described in Bulgarelli *et al.* (2012), and storing the samples at -80°C.

148

149 *Experiment 2: Candidate Drivers of Rhizosphere Community Structure.* To characterize the  
150 effects of circadian period misfunction on rhizosphere bacterial community structure, 10  
151 replicates of Ws, *toc1-21*, and *ztl-30* genotypes were planted in a fully randomized design and  
152 grown for four weeks. Rhizosphere samples were collected as described above at 6 P.M. on July  
153 21 and stored at -80°C. All samples were collected prior to visible signs of bolting, or the

154 transition from a vegetative to a reproductive state, to avoid confounding effects of plant  
155 developmental stage (Lundberg *et al.*, 2012; Chaparro *et al.*, 2014). At the end of this  
156 experiment, we collected additional rhizosphere soil from 4 replicates of each of the three  
157 genotypes to generate the inoculum for *Experiment 3*.

158

159 *Experiment 3: Rhizosphere Community Feedbacks on Plant Performance*. To test if rhizosphere  
160 microbiomes assembled by the three plant genotypes had differential effects on plant  
161 performance, we synchronously germinated seeds of the Ws genotype and planted these seeds in  
162 sterilized soil media inoculated with soil slurry generated by the Ws, *toc1-21*, or *ztl-30* genotypes  
163 and collected at the end of *Experiment 2* (N = 60; 20 replicates × 3 inoculates). To determine the  
164 effects of the rhizosphere microbiome treatment on plant performance, rosette diameter was  
165 measured weekly for three weeks. In a second experiment, we allowed seeds to germinate  
166 naturally in sterilized soil media inoculated with the same soil slurries (N = 60; 20 replicates × 3  
167 inoculates). For this experiment, seeds were checked daily for germination as estimated from the  
168 first observation of cotyledons.

169

#### 170 DNA Extraction and Amplicon Sequencing

171 To extract microbial DNA, rhizosphere samples were placed into 15ml Nunc Conical Centrifuge  
172 Tubes (Thermo Scientific, Waltham, MA, USA) containing 3ml of phosphate-buffered saline  
173 (PBS), and then agitated for 15 minutes to separate soil particles from plant roots as described in  
174 Bulgarelli *et al.* 2012. Plant roots were then removed with sterilized forceps and the samples  
175 were centrifuged for 15 minutes at 3000 rcf. The supernatant was discarded, and 0.25g of the  
176 pellet was put into bead tubes from the Mobio Power Soil DNA Isolation Kit (Mobio



177 Laboratories, Carlsbad, CA, USA) using sterilized disposable spatulas. DNA was extracted from  
178 each sample following the manufacturer's instructions. With each round of extractions, a soilless  
179 blank was included as a negative control. At the end of each round, PCR was performed to  
180 ensure sufficient DNA yields and reagent sterility.

181 DNA extracts were sent to the Marine Biological Laboratories (Woods Hole, MA, USA)  
182 for amplicon library preparation of the V4V5 region of the 16S rRNA gene using the 518F and  
183 926R primers (Huse *et al.*, 2014). Sequencing was performed on the Illumina MiSeq platform  
184 (Illumina, San Diego, CA, USA) as described in Nelson *et al.* (2014). Sequence reads were  
185 demultiplexed and quality filtered (Phred score  $\geq 20$ , chimera removal by ChimeraSlayer) using  
186 QIIME 1.9.1, uclust was used to perform open reference OTU picking at 97% sequence  
187 similarity using the Greengenes database (ver. 13.8), and all singletons were removed to avoid  
188 the possibility that a sequencing error was called as an OTU (Caporaso *et al.*, 2010; Bokulich *et*  
189 *al.*, 2012; McDonald *et al.*, 2012; Edgar, 2010; Haas *et al.*, 2011). We rarefied to 100 000 reads  
190 per sample to ensure common sampling effort. All sequences have been deposited into the Short  
191 Read Archive (SRA) under accession number SRA579608.

192

### 193 Sequencing data analyses

194 To describe rhizosphere community structure, we generated Jaccard (presence-absence analysis)  
195 and Bray-Curtis (abundance analysis) dissimilarity matrices, and Shannon diversity estimates in  
196 QIIME (Caporaso *et al.*, 2010). For *Experiment 1*, we used adonis to determine if rhizosphere  
197 community structure differed between day (6 P.M.) and night (6 A.M.) time points. To test if  
198 shifts in community structure were consistent between day and night time points, we used  
199 Pearson's correlation coefficients to compare the percent change in OTU abundance between 6

200 A.M. and 6 P.M. on July 21 and the percent change in OTU abundance between 6 P.M. on July  
201 21 and 6 A.M. on July 22, for OTUs with more than 100 reads per sample to avoid potentially  
202 confounding effects of low-abundance taxa. For *Experiments 2 & 3*, we used one-way ANOVAs  
203 and Tukey's HSD *post hoc* comparison tests using the *car* and *agricolae* R packages to  
204 characterize differences in Principal Coordinates between genotype along axis 1 and to  
205 determine differences in plant performance between soil treatments (Fox *et al.*; de Mendiburu,  
206 2016). Moreover, OTUs were split into common (> 500 reads) or rare (< 500 reads) categories,  
207 and presence-absence analyses and abundance analyses were performed again on the split  
208 datasets to determine if effects of clock genotype were detected using common or rare microbial  
209 taxa alone. Further, sequence data was reanalyzed without rarefaction using the R package  
210 *Phyloseq*, to determine if results were consistent in the absence of rarefaction (McMurdie *et al.*,  
211 2014). Results were similar regardless of rarefaction, that is, the effect of host plant genotype  
212 was significant for both binary Jaccard ( $p = 0.001$ ) and Bray-Curtis dissimilarity ( $p = 0.001$ )  
213 analyses with and without rarefaction; here, we present the results of analyses based on  
214 rarefaction. All plots were generated using the R package *ggplot2* (Wickham, 2009).

215 To identify OTUs that explain observed differences in plant performance due to soil  
216 overstory history in *Experiment 3*, we used the *indicspecies* package for indicator value analysis  
217 in R 3.0.3 and *LefSe* on the galaxy web platform (Cáceres and Legendre, 2009; Dufreñe and  
218 Legendre, 1997; Segata *et al.*, 2011; R Core Team, 2013). Indicator value analysis (IVA) has  
219 been used commonly in ecological studies to ascertain species that underlie treatment or site  
220 differences (Dufreñe and Legendre 1997), and is used here to test which OTU(s) is(are) specific  
221 to a given level of a factor (e.g., present / abundant in the rhizospheres of Ws replicates and  
222 absent from *toc1-21* and *ztl-30* rhizospheres). Notably, the calculation of IVA weights presence-

223 absence and abundance, and as such may be sensitive to rare taxa. *LefSe* performs linear  
224 discriminant analysis on sequence data to identify marker taxa that underlie treatment  
225 differences, and is weighted preferentially by abundance differences of more common taxa.  
226 Because rare OTUs contributed to microbiome differences between host plant genotypes, we  
227 used both IVA and *Lefse*. Finally, we coarsely estimated microbial community size by dividing  
228 the quantity of extracted DNA using a Qubit (ThermoFisher Scientific Waltam, MA, USA) by  
229 the mass of soil used for each extraction to determine if microbial community size influenced  
230 plant performance in *experiment 3*.

231

## 232 **Results**

233

### 234 Sequencing Results

235 For *Experiment 1*, after quality filtering, chimera removal, OTU picking, outlier sample filtering  
236 and rarefaction to 100 000 reads per sample (**Supplemental Figure 1a**), there was a total of 3  
237 700 000 high quality reads out of 10 250 881 raw reads. For *Experiment 2*, after similar  
238 processing, but rarefaction to 116 000 reads per sample (**Supplemental Figure 1b**) there was a  
239 total 2 668 000 high quality reads out of 6 487 790 raw reads. The number of reads after each  
240 processing step can be found in **Supplemental Tables 1 and 2**.

241

### 242 Experiment 1: Temporal Changes in Rhizosphere Community Structure.

243 We found significant differences in rhizosphere community structure between the communities  
244 collected at 6 P.M. (day) and both of the two 6 A.M. (night) collections (P = 0.001 contrasting 6  
245 P.M. with the first collection at 6 A.M. on July 21 or P = 0.008 contrasting 6 P.M. with the

246 collection at 6 A.M. on July 22; **Figure 1a**). The percent change in OTU abundance between 6  
247 A.M. on July 21 and 6 P.M. was positively correlated with the percent change in OTU  
248 abundance between the 6 A.M. on July 22 and 6 P.M. time points ( $r = 0.423$ ,  $P < 0.001$ ). This  
249 relationship suggests that the abundance of many common OTUs shift in a similar manner  
250 between day and night time points (**Figure 1b**).

251

## 252 Experiment 2: Candidate Drivers of Rhizosphere Community Structure

253 Rhizosphere community composition (presence *vs.* absence of taxa), abundance, and diversity  
254 differed among genotypes (**Figure 2, Supplemental Figure 2**). From Jaccard presence-absence  
255 analysis, *Ws*, *toc1-21*, and *ztl-30* rhizosphere communities were significantly different from one  
256 another ( $P < 0.001$ ; **Figure 2a**). PCo1 describes the effect of progressive clock changes between  
257 short (lowest PCo values) *vs.* wild-type (intermediate values) *vs.* long (highest values)  
258 endogenous period lengths of the plants on rhizosphere community composition. Bray-Curtis  
259 relative abundance analysis revealed differences between the rhizosphere communities of the  
260 three clock genotypes, where *toc1-21* communities were different from both *Ws* ( $P = 0.02$ ) and  
261 *ztl-30* ( $P = 0.04$ ) communities, while *Ws* and *ztl-30* communities were not significantly different  
262 from one another ( $P = 0.39$ ; **Figure 2b**). This result suggests that a period length shorter than 24  
263 hrs specifically alters abundances of OTUs within the rhizosphere community. Likewise, the  
264 *toc1-21* rhizosphere communities showed significantly reduced richness and evenness based on  
265 Shannon's diversity index in comparison to *Ws* ( $P = 0.03$ ; **Figure 2c**).

266 To clarify the contributions of rare *vs.* common OTUs to host plant genotype differences,  
267 we analyzed the data when culled to different minimum read numbers. When culling to a  
268 minimum read number of 1 000 for an OTU (or approximately 1% of the community), Jaccard

269 and Bray Curtis dissimilarities were significant, indicating that common taxa contribute at least  
270 partially to observed differences among the three host plant genotypes in the presence-absence of  
271 taxa (**Figure 3a**) and to differences in OTU abundance between *toc1-21* and both *Ws* and *ztl-30*  
272 (**Figure 3b**). Communities culled to OTUs with between 1-500 reads showed significant  
273 differences in both composition and abundance, indicating that rare microbial taxa respond to  
274 plant genotype (**Figure 3cd**). In particular, when data for rare OTUs are analyzed, the distinction  
275 between *Ws* vs. *ztl-30* becomes significant ( $p = 0.001$ ) (cf **Figure 2b** vs. **Figure 3d**).

276 Combined, the IVA and *Lefse* analyses identified a total of 13 indicator OTUs associated  
277 with the *Ws* rhizosphere (**Figure 4**), 12 indicator OTUs associated with the *toc1-21* rhizosphere  
278 (**Supplemental Tables 7, 9**), and 12 indicator OTUs associated with the *ztl-30* rhizosphere  
279 (**Supplemental Table 8, 9**). Because IVA is more sensitive to rare taxa, the two methods select  
280 somewhat different OTUs as biomarkers of host plant genotype. Notably however, there is  
281 significant taxonomic overlap between the OTUs identified by IVA and *Lefse*. That is, taxa  
282 identified by IVA are phylogenetically related to those identified by *Lefse*, or vice versa. For  
283 instance, of the 13 indicator OTUs associated with the *Ws* rhizosphere, six taxa were members of  
284 the phylum Acidobacteria (IVA: DS-100;o\_;f\_;g\_, llb;f\_;g\_, PAUC26;f\_;g\_; *Lefse*:  
285 Acidobacteria, Solibacterales;f\_;g\_, iii1\_15;f\_;g\_) and two taxa were members of the  
286 Chloroflexi (Indicator species analysis: Anaerolineae;o\_;f\_;g\_, *Lefse*: Chloroflexi). From  
287 previous studies, both phyla and two taxa, *Agromyces* and *Cellulomonas*, have been previously  
288 described as growth promoting (Egamberdiyeva and Höflich, 2002; Kuffner *et al.*, 2008; Chen *et*  
289 *al.*, 2014; Kielak *et al.*, 2016). Finally, community size as estimated from DNA per unit soil  
290 mass did not significantly differ across clock genotypes ( $P = 0.11$ ).

291

292 Experiment 3: Rhizosphere Community Feedbacks on Plant Performance.

293 Soil overstory history had a significant influence on early plant performance (**Figure 5**). Wild-  
294 type plants grown in a soil with a history of Ws plants had significantly larger rosette diameters  
295 than plants grown in soils with a history of *toc1-21* and *ztl-30* after 1 week (19.4% and 14.4%,  
296 respectively;  $P = 0.002$ ) and 2 weeks of growth (10.8% and 8.3%, respectively;  $P = 0.04$ ).  
297 However, at the end of three weeks of growth, Ws plants grown in soils conditioned by each of  
298 the clock genotypes were only marginally different in size ( $P = 0.11$ ). In a germination  
299 experiment of similar design (in which seedlings were not transplanted but instead germinated  
300 directly on soil), Ws seeds in pots with Ws inoculum germinated an average of 5.2 days earlier  
301 than seeds planted into pots with *toc1-21* ( $P = 0.002$ ) inoculum and 5.7 days earlier than those  
302 planted into *ztl-30* ( $P = 0.024$ ) inoculated pots ( $P < 0.001$ ; **Figure 5b**).

303

304 **Discussion**

305

306 The rhizosphere microbiome has been referred to as the “second genome” of plants or the  
307 extended phenome (Berendsen *et al.*, 2012). In part, these names reflect the role of the  
308 rhizosphere microbiome in determining plant performance. Empirical studies suggest complex  
309 feedbacks between plants and microbes, under which plant species may modulate rhizosphere  
310 community structure via carbon exudation and under which microbes may alter plant phenotypes  
311 directly or via ecosystem services such as nutrient accessibility (Bulgarelli *et al.*, 2013). The  
312 mechanisms by which different plant genotypes may influence rhizosphere community structure  
313 remain largely unclear, as are the effects on plant performance of rhizosphere microbiomes  
314 selected by the plant host genotype (Heath and Tiffin, 2007; Panke-Buisse *et al.*, 2014; Lebeis *et*

315 *al.*, 2015). Understanding plant-rhizosphere microbiome interactions is agroecologically relevant  
316 because rhizosphere communities can strongly influence plant fitness and biomass, which can in  
317 turn inform evolutionary studies of adaptation, conservation, and agronomic practices (Pérez-  
318 Jaramillo *et al.*, 2016). In this study, we tested the role of the plant circadian clock as a mediator  
319 of plant-rhizosphere microbiome interactions. We hypothesized that 1) rhizosphere community  
320 structure may be temporally dynamic, if rhizosphere taxa may respond to diurnally patterned  
321 fluxes of carbon, water, or nutrient availability into the rhizosphere (or other diurnally patterned  
322 plant phenotypes). 2) We further hypothesized that clock malfunction would play a role in  
323 shaping community structure, because differences in plant physiology attributable to genotype  
324 would lead to differences in rhizosphere community structure. 3) Finally, we hypothesized that  
325 differences in rhizosphere community structure attributable to plant genotype could lead to  
326 differences in community function with regards to plant performance.

327         The composition of plant-associated microbiomes is known to shift on long time scales,  
328 such as across seasons or across developmental stages of the plant host (Lundberg *et al.*, 2012;  
329 Chaparro *et al.*, 2014; Wagner *et al.*, 2016). The short duration of many microbial life cycles  
330 means that microbial community composition may also respond to more rapid changes in the  
331 environment. Yet, it remains unclear if the community composition of microbes found in  
332 association with plants changes on short timeframes, such as across day-night transitions. We  
333 observed diurnally patterned shifts in rhizosphere community structure. For instance, we  
334 observed shifts in community structure between day (6 P.M.) and night (6 A.M.) time points, and  
335 we observed that these shifts in community structure were consistent between the day and both  
336 night time points (**Figure 1**). Difference in community structure observed between the two time  
337 points may reflect the effects of day *vs.* night conditions and carbon, water, or nutrient

338 availability in the rhizosphere. Several prior studies have shown that the concentration of certain  
339 exudates varies over the course of day (Badri and Vivanco, 2009; Watt and Evans, 1999). For  
340 instance, Iijima *et al.* (2003) observed higher rates of mucilage exudation at night, while other  
341 studies have observed higher prevalence of flavonoids and catechin during day conditions  
342 (Hughes *et al.*, 1999; Iijima *et al.*, 2003; Tharayil and Triebwasser, 2010). Further, rhizosphere  
343 water is depleted diurnally, depending on root and soil hydraulics (Sperry *et al.*, 1998), and the  
344 transpiration stream increases nutrient flow (Matimati *et al.*, 2014), potentially depleting soil  
345 nutrients in the rhizosphere zone. Therefore, rhizosphere taxa and populations may vary in  
346 abundance depending on soil resource availability, leading to our observed differences in  
347 community structure between day and night time points. Future experiments should be designed  
348 to tease apart the relative influence of root exudates, water dynamics, and nutrient uptake within  
349 the rhizosphere on microbes.

350         Specific plant genes play important roles in shaping rhizosphere community structure  
351 (Bravo *et al.*, 2016), and here we observed that circadian clock genes significantly influence  
352 rhizosphere community structure. In the current study, plant genotype explained 19.1% of the  
353 variation in community composition (presence *vs.* absence of taxa), 21.7% of the variation in  
354 community relative abundances, and brought about differences in community diversity between  
355 short (*toc1-21*) *vs.* longer (Ws, *ztl-30*) period genotypes (**Figure 2**). These differences in  
356 community structure explained by clock genotype surpass variation explained by genotype in  
357 previous studies of the influence of plant genotype on rhizosphere community structure  
358 (Lundberg *et al.*, 2012; Bulgarelli *et al.*, 2012; Peiffer *et al.*, 2013; Lebeis *et al.*, 2015). Our  
359 results thus suggest that circadian clock misfunction has a strong influence on rhizosphere  
360 community structure. The large percent variance explained may arise from the pervasive



361 transcriptomic and phenotypic effects of clock malfunction on the plant host, or potentially the  
362 microbial inoculant used here is one that amplifies the effect of host genotype, as demonstrated  
363 in other studies (Weinert *et al.*, 2011; Peiffer *et al.*, 2013).

364 *TIMING OF CAB EXPRESSION 1* had a particularly pronounced impact on rhizosphere  
365 community structure, because strong mutant alleles in this gene led to changes in community  
366 composition, abundance, and diversity (**Figure 2**). On the other hand, disruption of *ZEITLUPE*  
367 had less of an influence on shaping rhizosphere community structure, with its effect limited to  
368 differences in OTU presence-absence relative to Ws (**Figure 2**). One possible explanation for the  
369 asymmetric effects of clock malfunction is that long period lengths theoretically enable better  
370 phase adjustment to dawn, such that period lengths shorter than 24 hrs may have more  
371 detrimental fitness consequences in nature (or in this case lead to greater deviations in  
372 rhizosphere microbial community structure) in comparison to period lengths greater than 24 hrs  
373 (Johnson and Kondo, 1992; McClung, 2006; Kevei *et al.*, 2006; Hotta *et al.*, 2007). Regardless  
374 of the exact mechanisms, clock malfunction and the mismatch between endogenous plant cycles  
375 and exogenous cycles affected aspects of microbial community structure.

376 As in any ecosystem, there is a link between community structure and function (Tilman  
377 *et al.*, 1997). Several studies have illustrated this relationship in plant-rhizosphere microbiome  
378 interactions, where differences in plant performance can be attributed to differences in  
379 rhizosphere community structure (Mendes *et al.*, 2011; Zolla *et al.*, 2013; Mendes *et al.*, 2013;  
380 Wagner *et al.*, 2014). Here, differences in community structure brought about by mutations in  
381 circadian clock genes led to differences in plant performance among wild-type Ws plants grown  
382 in soils with differing plant genotype overstory histories (**Figure 5**). Ws plants performed best  
383 when exposed to an inoculum from soils in which wild-type rather than clock mutant genotypes

384 had been grown. We observed differences in the timing of germination, where Ws seeds sown in  
385 soils with a history of Ws occurrence germinated earlier. In comparison to untreated soil,  
386 autoclaved soil, such as that used here, differs in both chemical and physical properties and  
387 reflects a novel and possibly more stressful environment for plants (Trevors, 1996; Brulé *et al.*,  
388 2001; Lau and Lennon, 2011); differences in germination observed here may therefore reflect  
389 that the microbes from Ws-conditioned soil enable normal germination under the novel  
390 autoclaved soil conditions (rather than an acceleration of germination timing under natural  
391 conditions *per se*) (Lau and Lennon, 2011; Mahmood *et al.*, 2014). Beyond germination timing,  
392 we observed that wild-type plants were also larger when grown in soils with a history of Ws  
393 rather than mutant genotype growth. These findings from two experiments in which soils were  
394 independently conditioned by Ws *vs.* mutant genotypes suggest first that plants can select  
395 explicitly beneficial soil communities that improve initial offspring performance, and second that  
396 disruption of these communities by mutations in clock genes adversely affects initial offspring  
397 phenology and growth.

398         While additional research is required to ascertain causality, community composition  
399 patterns and indicator analyses provide hypotheses as to which OTUs may lead to these  
400 differences in performance (Cáceres and Legendre, 2009; DeAngelis *et al.*, 2015). Here, we  
401 identified 13 indicator OTUs associated with Ws rhizosphere. Parallel to the differences in  
402 microbial community structure among host plant genotypes (**Figures 2 and 3**), one possibility is  
403 that rare OTUs underlie differences in plant performance observed between the Ws and *ztl-30*  
404 rhizosphere microbiomes, while rare and common OTUs could contribute to plant performance  
405 differences observed between the Ws and *toc1-21* microbiomes. Rare OTUs could affect plant  
406 performance via so-called indirect effects, such as facilitation of or competition with explicitly

407 plant growth-promoting microbes, while common microbes could promote plant growth through  
408 direct interactions (Saleem *et al.*, 2016). Specifically in regard to the indicator species analyses  
409 (IVA and *Lefse*), the presence and abundance of Acidobacteria (Kielak *et al.*, 2016), Chloroflexi  
410 (Chen *et al.*, 2014), *Cellulomonas* (Egamberdiyeva and Höflich, 2002), and *Agromyces* (Kuffner  
411 *et al.*, 2008) in the Ws rhizosphere may explain the differences in plant size between rhizosphere  
412 treatments, as these OTUs have been previously associated with plant growth promotion.

413 In sum, we have shown that the plant circadian clock shapes rhizosphere community  
414 structure, particularly the presence of rare taxa. Further, this plant genetic driver of community  
415 assembly also influences community function, as estimated from plant performance. Because  
416 community structure may shift in response to day and night conditions, future characterizations  
417 of the rhizosphere should account for differences in community structure due to the timing of  
418 rhizosphere collection. Moreover, more work needs to be done investigating the role of other  
419 pertinent clock genes and loci that regulate plant physiology, as these may also shape  
420 rhizosphere community structure and function.

421

## 422 **Acknowledgements**

423 This work was supported by the National Science Foundation grants (IOS-1444571) to C.W.,  
424 B.E.E., L.M., and a Wyoming INBRE sequencing and bioinformatics award to C.H. and C.W.  
425 We thank the Powells' for allowing us to collect soil from their property and Lindsay Leverett  
426 for collecting soil from the Catsburg site.

427

## 428 **Conflict of Interest**

429 The authors declare no conflicts of interest.

430 **References**

- 431 Badri D V., Vivanco JM. (2009). Regulation and function of root exudates. *Plant, Cell Environ*  
432 **32**: 666–681.
- 433 Bais HP, Weir TL, Perry LG, Gilroy S, Vivanco JM. (2006). The Role of Root Exudates in  
434 Rhizosphere Interactions With Plants and Other Organisms. *Annu Rev Plant Biol* **57**: 233–266.
- 435 Bashan Y. (1998). Inoculants of plant growth-promoting bacteria for use in agriculture.  
436 *Biotechnol Adv* **16**: 729–770.
- 437 Berendsen RL, Pieterse CMJ, Bakker PAHM. (2012). The rhizosphere microbiome and plant  
438 health. *Trends Plant Sci* **17**: 478–486.
- 439 Bokulich NA, Subramanian S, Faith JJ, Gevers D, Gordon JI, Knight R, *et al.* (2012). Quality-  
440 filtering vastly improves diversity estimates from Illumina amplicon sequencing. *Nat Methods*  
441 **10**: 57–59.
- 442 Bravo A, York T, Pumplin N, Mueller LA, Harrison MJ. (2016). Genes conserved for arbuscular  
443 mycorrhizal symbiosis identified through phylogenomics. *Nat Plants* **2**: 15208.
- 444 Brulé C, Frey-Klett P, Pierrat J., Courrier S, Gérard F, Lemoine M., *et al.* (2001). Survival in the  
445 soil of the ectomycorrhizal fungus *Laccaria bicolor* and the effects of a mycorrhiza helper  
446 *Pseudomonas fluorescens*. *Soil Biol Biochem* **33**: 1683–1694.
- 447 Bulgarelli D, Rott M, Schlaeppi K, Ver Loren van Themaat E, Ahmadinejad N, Assenza F, *et al.*  
448 (2012). Revealing structure and assembly cues for *Arabidopsis* root-inhabiting bacterial  
449 microbiota. *Nature* **488**: 91–95.
- 450 Bulgarelli D, Schlaeppi K, Spaepen S, van Themaat EVL, Schulze-Lefert P. (2013). Structure  
451 and Functions of the Bacterial Microbiota of Plants. *Annu Rev Plant Biol* **64**: 807–838.
- 452 Cáceres M De, Legendre P. (2009). Associations between species and groups of sites: indices

453 and statistical inference. *Ecology* **90**: 3566–3574.

454 Çakmakçı R, Kantar F, Sahin F. (2001). Effect of N<sub>2</sub>-fixing bacterial inoculations on yield of  
455 sugar beet and barley. *J Plant Nutr Soil Sci* **164**: 527.

456 Caporaso JG, Kuczynski J, Stombaugh J, Bittinger K, Bushman FD, Costello EK, *et al.* (2010).  
457 QIIME allows analysis of high-throughput community sequencing data. *Nat Methods* **7**: 335–  
458 336.

459 Chaparro JM, Badri D V, Vivanco JM. (2014). Rhizosphere microbiome assemblage is affected  
460 by plant development. *ISME J* **8**: 790–803.

461 Chen C., Condrón L., Davis M., Sherlock R. (2002). Phosphorus dynamics in the rhizosphere of  
462 perennial ryegrass (*Lolium perenne* L.) and radiata pine (*Pinus radiata* D. Don.). *Soil Biol*  
463 *Biochem* **34**: 487–499.

464 Chen M, Li X, Yang Q, Chi X, Pan L, Chen N, *et al.* (2014). Dynamic succession of soil  
465 bacterial community during continuous cropping of peanut (*Arachis hypogaea* L.). *PLoS One* **9**:  
466 e101355.

467 Covington MF, Maloof JN, Straume M, Kay SA, Harmer SL. (2008). Global transcriptome  
468 analysis reveals circadian regulation of key pathways in plant growth and development. *Genome*  
469 *Biol* **9**: R130.

470 DeAngelis KM, Pold G, Topcuoglu BD, van Diepen LTA, Varney RM, Blanchard JL, *et al.*  
471 (2015). Long-term forest soil warming alters microbial communities in temperate forest soils.  
472 *Front Microbiol* **6**: 104.

473 Dennis PG, Miller AJ, Hirsch PR. (2010). Are root exudates more important than other sources  
474 of rhizodeposits in structuring rhizosphere bacterial communities? *FEMS Microbiol Ecol* **72**:  
475 313–327.

- 476 Dodd AN, Parkinson K, Webb AAR. (2004). Independent circadian regulation of assimilation  
477 and stomatal conductance in the *ztl-1* mutant of Arabidopsis. *New Phytol* **162**: 63–70.
- 478 Dodd AN, Salathia N, Hall A, Kévei E, Tóth R, Nagy F, *et al.* (2005). Plant Circadian Clocks  
479 Increase Photosynthesis, Growth, Survival, and Competitive Advantage. *Science (80- )* **309**:  
480 630–633.
- 481 Dufreñne M, Legendre P. (1997). Species assemblages and indicator species: the need for a  
482 flexible asymmetrical approach. *Ecol Monogr* **67**: 345–366.
- 483 Edgar RC. (2010). Search and clustering orders of magnitude faster than BLAST. *Bioinformatics*  
484 **26**: 2460–2461.
- 485 Egamberdiyeva D, Höflich G. (2002). Root colonization and growth promotion of winter wheat  
486 and pea by *Cellulomonas* spp. at different temperatures. *Plant Growth Regul* **38**: 219–224.
- 487 Fox J, Weisberg S, Fox J. An R companion to applied regression.
- 488 Fujiwara S, Wang L, Han L, Suh S-S, Salome PA, McClung CR, *et al.* (2008). Post-translational  
489 Regulation of the Arabidopsis Circadian Clock through Selective Proteolysis and  
490 Phosphorylation of Pseudo-response Regulator Proteins. *J Biol Chem* **283**: 23073–23083.
- 491 Greenham K, McClung CR. (2015). Integrating circadian dynamics with physiological processes  
492 in plants. *Nat Rev Genet* **16**: 598–610.
- 493 Haas BJ, Gevers D, Earl AM, Feldgarden M, Ward D V, Giannoukos G, *et al.* (2011). Chimeric  
494 16S rRNA sequence formation and detection in Sanger and 454-pyrosequenced PCR amplicons.  
495 *Genome Res* **21**: 494–504.
- 496 Harmer SL. (2009). The Circadian System in Higher Plants. *Annu Rev Plant Biol* **60**: 357–377.
- 497 Harmer SL, Hogenesch JB, Straume M, Chang HS, Han B, Zhu T, *et al.* (2000). Orchestrated  
498 transcription of key pathways in Arabidopsis by the circadian clock. *Science* **290**: 2110–3.

- 499 Heath KD, Tiffin P. (2007). Context dependence in the coevolution of plant and rhizobial  
500 mutualists. *Proceedings Biol Sci* **274**: 1905–12.
- 501 Henning JA, Weston DJ, Pelletier DA, Timm CM, Jawdy SS, Classen AT. (2016). Root bacterial  
502 endophytes alter plant phenotype, but not physiology. *PeerJ* **4**: e2606.
- 503 Hotta CT, Gardner MJ, Hubbard KE, Baek SJ, Dalchau N, Suhita D, *et al.* (2007). Modulation of  
504 environmental responses of plants by circadian clocks. *Plant, Cell Environ* **30**: 333–349.
- 505 Hughes M, Donnelly C, Crozier A, Wheeler CT. (1999). Effects of the exposure of roots of  
506 *Alnus glutinosa* to light on flavonoids and nodulation. *Can J Bot* **77**: 1311–1315.
- 507 Huse SM, Young VB, Morrison HG, Antonopoulos DA, Kwon J, Dalal S, *et al.* (2014).  
508 Comparison of brush and biopsy sampling methods of the ileal pouch for assessment of mucosa-  
509 associated microbiota of human subjects. *Microbiome* **2**: 5.
- 510 Iijima M, Sako Y, Rao TP. (2003). A new approach for the quantification of root-cap mucilage  
511 exudation in the soil. *Plant Soil* **255**: 399–407.
- 512 Johnson CH, Kondo T. (1992). Light Pulses Induce “Singular” Behavior and Shorten  
513 the Period of the Circadian Phototaxis Rhythm in the CW15 Strain of *Chlamydomonas*. *J Biol*  
514 *Rhythms* **7**: 313–327.
- 515 Jones DL, Nguyen C, Finlay RD. (2009). Carbon flow in the rhizosphere: carbon trading at the  
516 soil–root interface. *Plant Soil* **321**: 5–33.
- 517 Kevei E, Gyula P, Hall A, Kozma-Bognár L, Kim W-Y, Eriksson ME, *et al.* (2006). Forward  
518 genetic analysis of the circadian clock separates the multiple functions of ZEITLUPE. *Plant*  
519 *Physiol* **140**: 933–45.
- 520 Kielak AM, Cipriano MAP, Kuramae EE. (2016). Acidobacteria strains from subdivision 1 act  
521 as plant growth-promoting bacteria. *Arch Microbiol* **198**: 987–993.

- 522 Kim W-Y, Hicks KA, Somers DE. (2005). Independent roles for EARLY FLOWERING 3 and  
523 ZEITLUPE in the control of circadian timing, hypocotyl length, and flowering time. *Plant*  
524 *Physiol* **139**: 1557–69.
- 525 Kuffner M, Puschenreiter M, Wieshammer G, Gorfer M, Sessitsch A. (2008). Rhizosphere  
526 bacteria affect growth and metal uptake of heavy metal accumulating willows. *Plant Soil* **304**:  
527 35–44.
- 528 Lau JA, Lennon JT. (2011). Evolutionary ecology of plant-microbe interactions: soil microbial  
529 structure alters selection on plant traits. *New Phytol* **192**: 215–224.
- 530 Lebeis SL, Paredes SH, Lundberg DS, Breakfield N, Gehring J, McDonald M, *et al.* (2015).  
531 Salicylic acid modulates colonization of the root microbiome by specific bacterial taxa. *Science*  
532 (80- ) **349**.
- 533 Lugtenberg B, Kamilova F. (2009). Plant-Growth-Promoting Rhizobacteria. *Annu Rev Microbiol*  
534 **63**: 541–556.
- 535 Lundberg DS, Lebeis SL, Paredes SH, Yourstone S, Gehring J, Malfatti S, *et al.* (2012).  
536 Defining the core *Arabidopsis thaliana* root microbiome. *Nature* **488**: 86–90.
- 537 Mahmood T, Mehnaz S, Fleischmann F, Ali R, Hashmi ZH, Iqbal Z. (2014). Soil sterilization  
538 effects on root growth and formation of rhizosheaths in wheat seedlings. *Pedobiologia (Jena)* **57**:  
539 123–130.
- 540 Matimati I, Anthony Verboom G, Cramer MD. (2014). Do hydraulic redistribution and nocturnal  
541 transpiration facilitate nutrient acquisition in *Aspalathus linearis*? *Oecologia* **175**: 1129–1142.
- 542 Mauricio R. (1998). Costs of Resistance to Natural Enemies in Field Populations of the Annual  
543 Plant *Arabidopsis thaliana*. *Am Nat* **151**: 20–28.
- 544 McClung CR. (2006). Plant circadian rhythms. *Plant Cell* **18**: 792–803.



545 McDonald D, Price MN, Goodrich J, Nawrocki EP, DeSantis TZ, Probst A, *et al.* (2012). An  
546 improved Greengenes taxonomy with explicit ranks for ecological and evolutionary analyses of  
547 bacteria and archaea. *ISME J* **6**: 610–8.

548 McMurdie PJ, Holmes S, Hoffmann C, Bittinger K, Chen Y. (2014). Waste Not, Want Not: Why  
549 Rarefying Microbiome Data Is Inadmissible McHardy AC (ed). *PLoS Comput Biol* **10**:  
550 e1003531.

551 Mendes R, Garbeva P, Raaijmakers JM. (2013). The rhizosphere microbiome: significance of  
552 plant beneficial, plant pathogenic, and human pathogenic microorganisms. *FEMS Microbiol Rev*  
553 **37**: 634–663.

554 Mendes R, Kruijt M, de Bruijn I, Dekkers E, van der Voort M, Schneider JHM, *et al.* (2011).  
555 Deciphering the Rhizosphere Microbiome for Disease-Suppressive Bacteria. *Science (80- )* **332**.  
556 de Mendiburu F. (2016). agricolae: Statistical Procedures for Agricultural Research.  
557 <https://cran.r-project.org/web/packages/agricolae/index.html>.

558 Millar AJ, Carré IA, Strayer CA, Chua NH, Kay SA. (1995). Circadian clock mutants in  
559 Arabidopsis identified by luciferase imaging. *Science* **267**: 1161–3.

560 de Montaigu A, Giakountis A, Rubin M, Tóth R, Cremer F, Sokolova V, *et al.* (2015). Natural  
561 diversity in daily rhythms of gene expression contributes to phenotypic variation. *Proc Natl Acad*  
562 *Sci U S A* **112**: 905–10.

563 Panke-Buisse K, Poole AC, Goodrich JK, Ley RE, Kao-Kniffin J. (2014). Selection on soil  
564 microbiomes reveals reproducible impacts on plant function. *ISME J* **9**: 980–989.

565 Peiffer JA, Spor A, Koren O, Jin Z, Tringe SG, Dangl JL, *et al.* (2013). Diversity and heritability  
566 of the maize rhizosphere microbiome under field conditions. *Proc Natl Acad Sci U S A* **110**:  
567 6548–53.

- 568 Pérez-Jaramillo JE, Mendes R, Raaijmakers JM. (2016). Impact of plant domestication on  
569 rhizosphere microbiome assembly and functions. *Plant Mol Biol* **90**: 635–644.
- 570 R Core Team. (2013). R: A language and environment for statistical computing. R Foundation  
571 for Statistical Computing. e-pub ahead of print, doi: 3-900051-07-0.
- 572 Richardson AE, Barea J-M, McNeill AM, Prigent-Combaret C. (2009). Acquisition of  
573 phosphorus and nitrogen in the rhizosphere and plant growth promotion by microorganisms.  
574 *Plant Soil* **321**: 305–339.
- 575 Richardson AE, Simpson RJ. (2011). Soil microorganisms mediating phosphorus availability  
576 update on microbial phosphorus. *Plant Physiol* **156**: 989–96.
- 577 Saleem M, Law AD, Moe LA. (2016). Nicotiana Roots Recruit Rare Rhizosphere Taxa as Major  
578 Root-Inhabiting Microbes. *Microb Ecol* **71**: 469–472.
- 579 Salmela MJ, Greenham K, Lou P, McClung CR, Ewers BE, Weinig C. (2016). Variation in  
580 circadian rhythms is maintained among and within populations in *Boechera stricta*. *Plant Cell*  
581 *Environ* **39**: 1293–1303.
- 582 Segata N, Izard J, Waldron L, Gevers D, Miropolsky L, Garrett WS, *et al.* (2011). Metagenomic  
583 biomarker discovery and explanation. *Genome Biol* **12**: R60.
- 584 Sperry JS, Adler FR, Campbell GS, Comstock JP. (1998). Limitation of plant water use by  
585 rhizosphere and xylem conductance: results from a model. *Plant, Cell Environ* **21**: 347–359.
- 586 Talbot JM, Bruns TD, Taylor JW, Smith DP, Branco S, Glassman SI, *et al.* (2014). Endemism  
587 and functional convergence across the North American soil mycobiome. *Proc Natl Acad Sci U S*  
588 *A* **111**: 6341–6.
- 589 Tharayil N, Triebwasser DJ. (2010). Elucidation of a Diurnal Pattern of Catechin Exudation by  
590 *Centaurea stoebe*. *J Chem Ecol* **36**: 200–204.

591 Thornton B, Paterson E, Midwood AJ, Sim A, Pratt SM. (2004). Contribution of current carbon  
592 assimilation in supplying root exudates of *Lolium perenne* measured using steady-state <sup>13</sup>C  
593 labelling. *Physiol Plant* **120**: 434–441.

594 Tilman D, Knops J, Wedin D, Reich P, Ritchie M, Siemann E. (1997). The Influence of  
595 Functional Diversity and Composition on Ecosystem Processes. *Science* (80- ) **277**.

596 Trevors JT. (1996). Sterilization and inhibition of microbial activity in soil. *J Microbiol Methods*  
597 **26**: 53–59.

598 van de Voorde TFJ, van der Putten WH, Bezemer TM. (2012). Soil inoculation method  
599 determines the strength of plant–soil interactions. *Soil Biol Biochem* **55**: 1–6.

600 Wagner MR, Lundberg DS, Coleman-Derr D, Tringe SG, Dangl JL, Mitchell-Olds T. (2014).  
601 Natural soil microbes alter flowering phenology and the intensity of selection on flowering time  
602 in a wild *Arabidopsis* relative. *Ecol Lett* **17**: 717–26.

603 Wagner MR, Lundberg DS, del Rio TG, Tringe SG, Dangl JL, Mitchell-Olds T, *et al.* (2016).  
604 Host genotype and age shape the leaf and root microbiomes of a wild perennial plant. *Nat*  
605 *Commun* **7**: 12151.

606 Watt M, Evans JR. (1999). Linking development and determinacy with organic acid efflux from  
607 proteoid roots of white lupin grown with low phosphorus and ambient or elevated atmospheric  
608 CO<sub>2</sub> concentration. *Plant Physiol* **120**: 705–16.

609 Weinert N, Piceno Y, Ding G-C, Meincke R, Heuer H, Berg G, *et al.* (2011). PhyloChip  
610 hybridization uncovered an enormous bacterial diversity in the rhizosphere of different potato  
611 cultivars: many common and few cultivar-dependent taxa. *FEMS Microbiol Ecol* **75**: 497–506.

612 Wickham H. (2009). *ggplot2: Elegant Graphics for Data Analysis*. Springer-Verlag New York:  
613 New York.

614 Yerushalmi S, Green RM. (2009). Evidence for the adaptive significance of circadian rhythms.

615 *Ecol Lett* **12**: 970–981.

616 Zolla G, Badri D V., Bakker MG, Manter DK, Vivanco JM. (2013). Soil microbiomes vary in

617 their ability to confer drought tolerance to Arabidopsis. e-pub ahead of print, doi:

618 10.1016/j.apsoil.2013.03.007.

619

620

621

622

623

624

625

626

627

628

629

630

631

632

633

634

635

636

637 **Figure Legends**

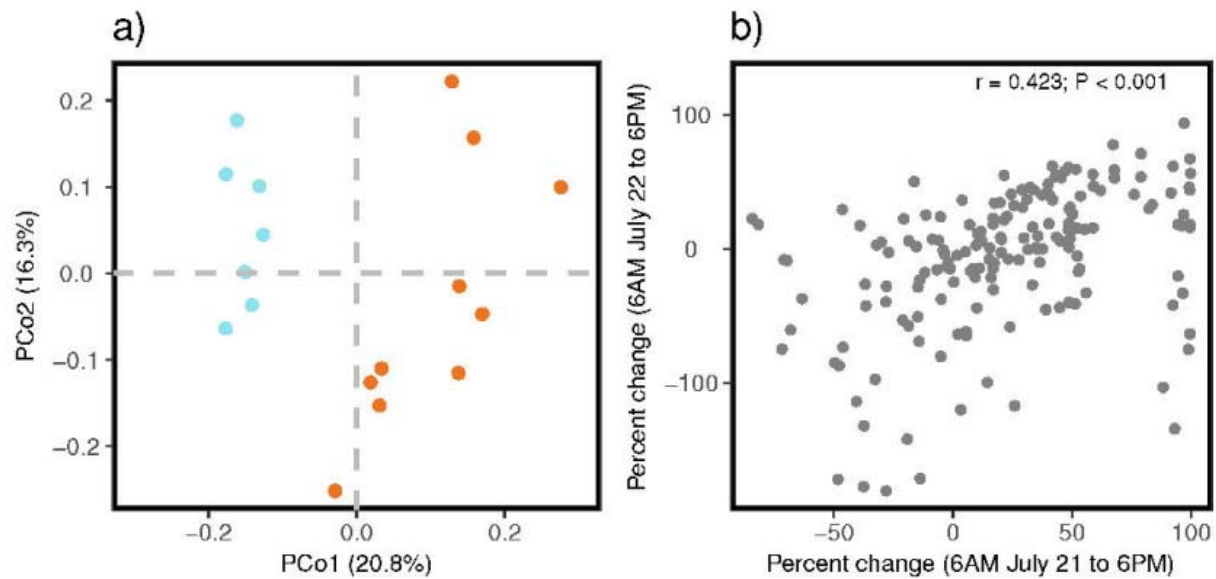

639 **Figure 1:** Day vs. night influences rhizosphere community structure. **a)** Principal Coordinate  
640 Analysis of Bray Curtis dissimilarities ( $n = 17$ ). Differences between the 6 P.M. (day, orange)  
641 and 6 A.M. (night, blue) time points were significant at  $P = 0.001$ . **b)** Bivariate relationship  
642 between percent change in OTU abundance from 6 A.M. to 6 P.M. July22 and percent change in  
643 OTU abundance from 6 A.M. on July 21 to 6 P.M. ( $r = 0.423$ ;  $P < 0.001$ ).

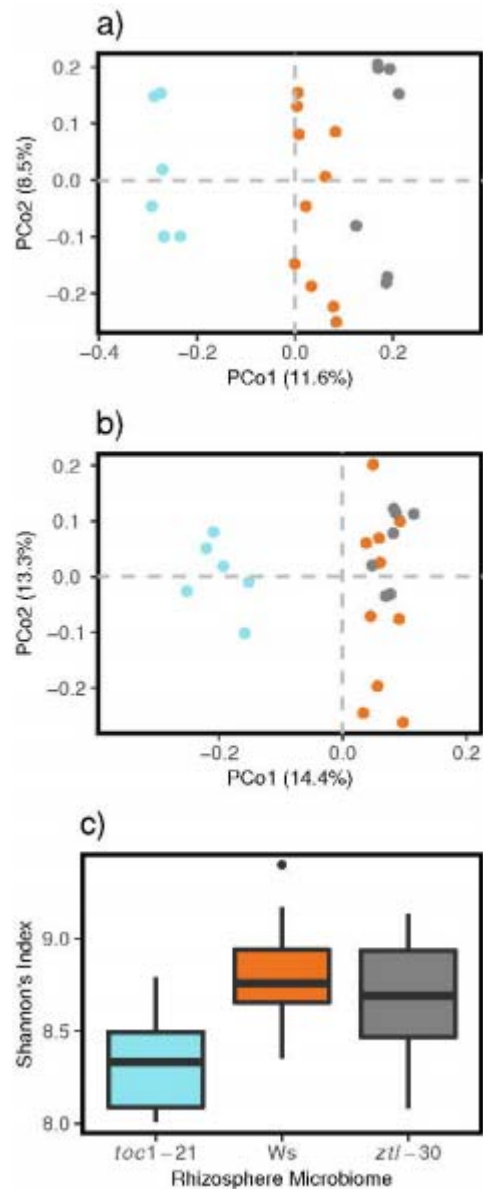

644

645 **Figure 2:** Clock function in *A. thaliana* alters rhizosphere community composition, abundances,

646 and diversity. (a) Principal coordinate analysis of Jaccard dissimilarities, where rhizosphere

647 communities of Ws are represented by orange circles, *toc1-21*: blue circles, and *ztl-30*: gray

648 circles ( $n = 23$ ). Rhizosphere community composition differs significantly between clock

649 genotypes ( $P = 0.001$ ). (b) Principal coordinate analysis of Bray-Curtis dissimilarities ( $n = 23$ ).

650 OTU abundances differ significantly between *toc1-21* and both the Ws and *ztl-30* genotypes ( $P =$

651 0.001). (c) Mean Shannon diversity index. The top and bottom of boxes represent the 75<sup>th</sup> and

652 25<sup>th</sup> percentiles, respectively. Whiskers represent 1.5 times the interquartile range. One-way  
653 ANOVA and Tukey's *post hoc* comparisons indicate significant differences between *toc1-21* and  
654 both the Ws and *ztl-30* genotypes ( $P = 0.03$ ).

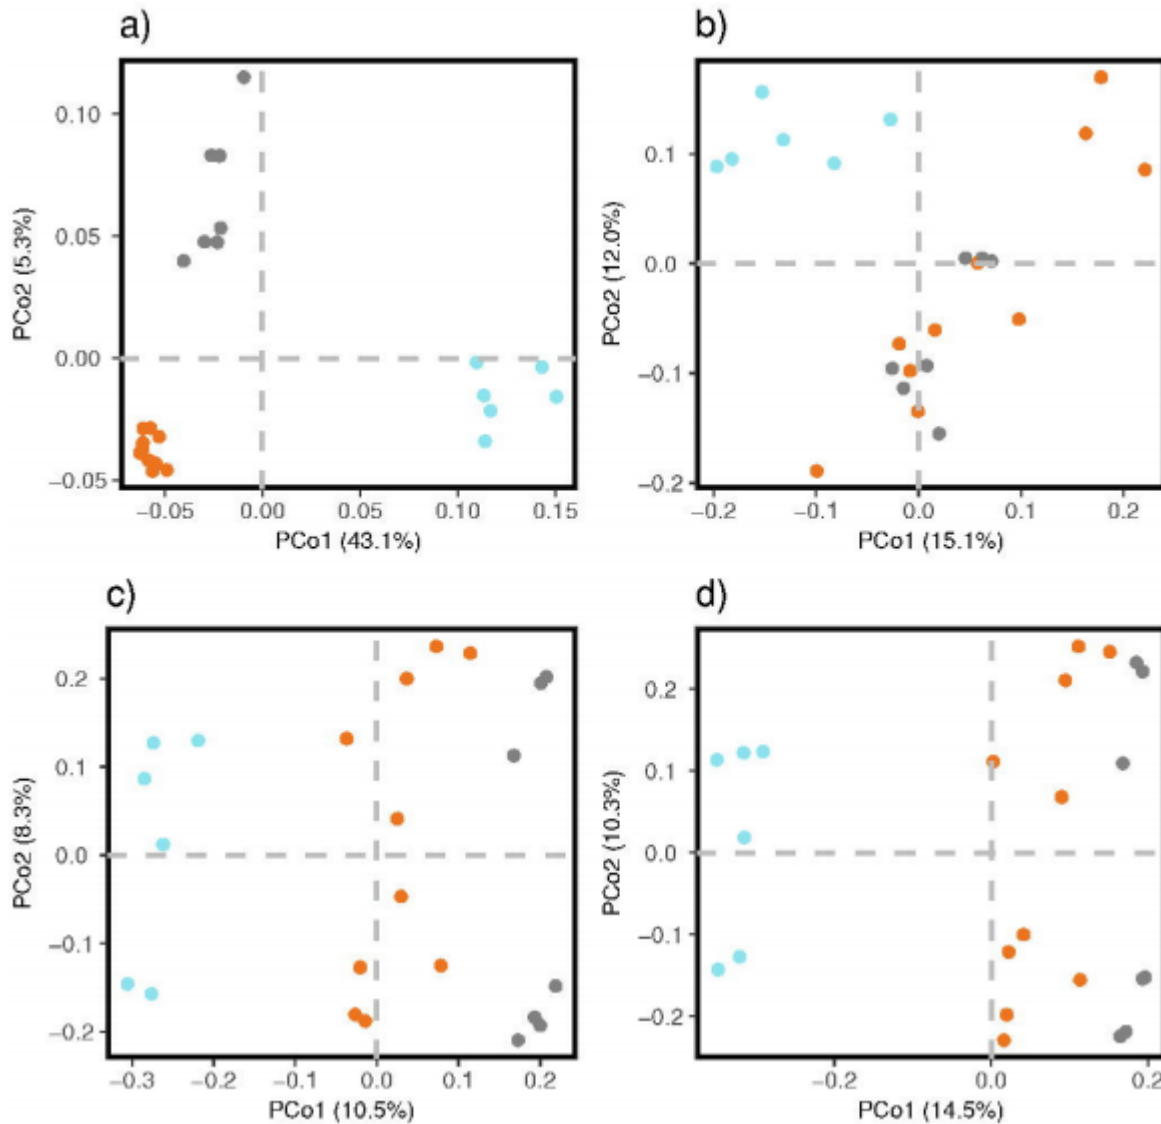

655

656 **Figure 3:** Plant genotype influences both common (> 500 reads) and rare (1-500 reads)  
657 rhizosphere taxa, but differences between the Ws and *ztl-30* rhizosphere communities are  
658 attributable to rare taxa. (a) Principal coordinate analysis of Jaccard dissimilarities of common  
659 taxa, where rhizosphere communities of Ws are represented by orange circles, *toc1-21*: blue

660 circles, and *ztl-30*: gray circles ( $n = 23$ ). Rhizosphere community composition differs  
661 significantly between clock genotypes ( $P = 0.001$ ). (b) Principal coordinate analysis of Bray-  
662 Curtis dissimilarities of common taxa ( $n = 23$ ). OTU abundances differ significantly between  
663 *toc1-21* and both the Ws and *ztl-30* genotypes ( $P = 0.001$ ). (c) Principal coordinate analysis of  
664 Jaccard dissimilarities of rare taxa ( $n = 23$ ). Rhizosphere community composition differs  
665 significantly between clock genotypes ( $P = 0.001$ ). (d) Principal coordinate analysis of Bray-  
666 Curtis dissimilarities of rare taxa ( $n = 23$ ). OTU abundances differ significantly between Ws and  
667 both *toc1-21* and *ztl-30* genotypes ( $P = 0.001$ ).

668

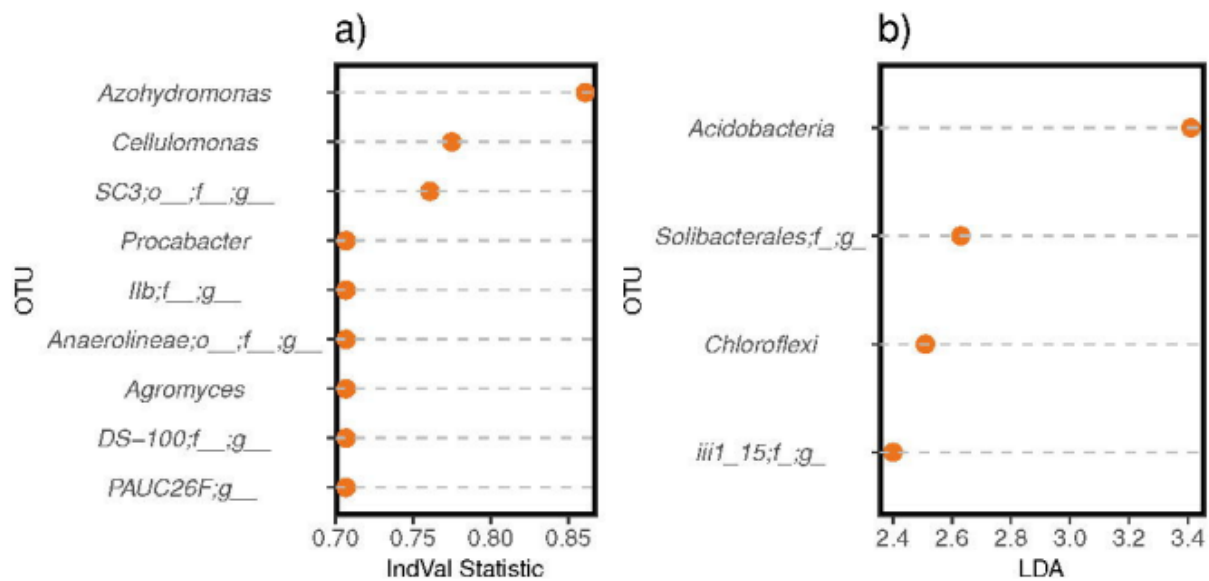

669

670 **Figure 4:** Indicator taxa based on (a) Indicator value analysis and (b) Lefse.



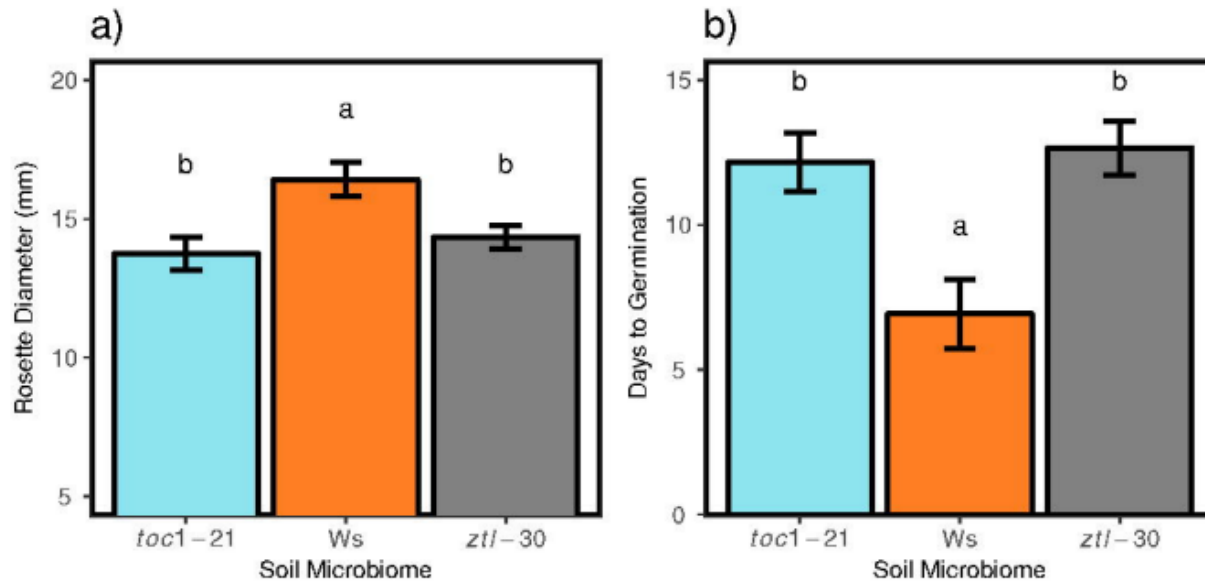

671  
672 **Figure 5:** Effects of soil overstory history on plant growth. Letters denote significant differences  
673 between soil treatments based on Tukey's Honest Significant Differences *post hoc* comparisons.  
674 **(a)** At Week 1 ( $n = 60$ ), plants grown in a soil with a history of *Ws* had significantly larger  
675 rosette diameters than plants grown in soils with a history of *toc1-21* or *ztl-30* ( $P = 0.002$ ). **(b)** In  
676 a separate experiment where seeds were not germinated synchronously ( $n = 35$ ), seeds sowed  
677 onto a soil with a history of *Ws* occurrence germinated significantly earlier than seeds sown into  
678 soils with a history of *toc1-21* or *ztl-30* genotypes ( $P < 0.001$ ).
